# Supplementary material for: Energy transfer in supramolecular [Crypt-RE]-[W6I14] solids
Source: Royal Society of Chemistry journal article supplement (doi:10.1039/d0dt01705a), 2020-01-01
Supplement: d0dt01705a1.pdf [file d0dt01705a1.pdf]

## Energy Transfer in Supramolecular [Crypt-RE]-[W<sub>6</sub>I<sub>14</sub>] Solids

*Thorsten Hummel<sup>†</sup>, Wolfgang Leis<sup>‡</sup>, Aaron Eckhardt<sup>†</sup>, Markus Ströbele<sup>†</sup>, David Enseling<sup>♣</sup>,*

*Thomas Jüstel<sup>♣</sup>, Hans-Jürgen Meyer<sup>†\*</sup>*

<sup>†</sup> Section for Solid State and Theoretical Inorganic Chemistry, Institute of Inorganic Chemistry,  
University of Tübingen, Auf der Morgenstelle 18, 72076 Tübingen, Germany

<sup>‡</sup> Section for Translational Chemistry, Institute of Inorganic Chemistry, University of Tübingen,  
Auf der Morgenstelle 18, 72076 Tübingen, Germany

<sup>♣</sup> Department of Chemical Engineering, Münster University of Applied Science,  
Stegerwaldstraße 39, 48565 Steinfurt, Germany.

**Table S1.** Single crystal structure refinement data for (1)K, (1)Rb, (1)Cs, (1)Sr, and (2)Na

| Compound                                        | (1)K                                                                                                                                                      | (1)Rb                                                                                                                                                                                    | (1)Cs                                                                                                                                                                                 | (1)Sr                                                                                                                                                                                                                                                                                  | (2)Na                                                                                                               |
|-------------------------------------------------|-----------------------------------------------------------------------------------------------------------------------------------------------------------|------------------------------------------------------------------------------------------------------------------------------------------------------------------------------------------|---------------------------------------------------------------------------------------------------------------------------------------------------------------------------------------|----------------------------------------------------------------------------------------------------------------------------------------------------------------------------------------------------------------------------------------------------------------------------------------|---------------------------------------------------------------------------------------------------------------------|
| Empirical formula                               | [{C <sub>18</sub> H <sub>36</sub> N <sub>2</sub> O <sub>6</sub> }K] <sub>2</sub> [W <sub>6</sub> I <sub>14</sub> ]                                        | [{C <sub>18</sub> H <sub>36</sub> N <sub>2</sub> O <sub>6</sub> }Rb] <sub>2</sub> [W <sub>6</sub> I <sub>14</sub> ]                                                                      | [{C <sub>18</sub> H <sub>36</sub> N <sub>2</sub> O <sub>6</sub> }Cs] <sub>2</sub> [W <sub>6</sub> I <sub>14</sub> ]                                                                   | [{C <sub>18</sub> H <sub>36</sub> N <sub>2</sub> O <sub>6</sub> }Sr] <sub>2</sub> [W <sub>6</sub> I <sub>14</sub> ]                                                                                                                                                                    | [{C <sub>24</sub> H <sub>33</sub> N <sub>4</sub> O <sub>7</sub> }Na] <sub>2</sub> [W <sub>6</sub> I <sub>14</sub> ] |
| CSD                                             | 1937039                                                                                                                                                   | 1937051                                                                                                                                                                                  | 1937550                                                                                                                                                                               | 1937593                                                                                                                                                                                                                                                                                | 1937034                                                                                                             |
| Exact formula                                   | [{C <sub>18</sub> H <sub>36</sub> N <sub>2</sub> O <sub>6</sub> }K] <sub>2</sub> [W <sub>6</sub> I <sub>14</sub> ]<br>· 2 C <sub>4</sub> H <sub>8</sub> O | [{C <sub>18</sub> H <sub>36</sub> N <sub>2</sub> O <sub>6</sub> }Rb] <sub>2</sub> [W <sub>6</sub> I <sub>14</sub> ]<br>· 0.5 C <sub>4</sub> H <sub>8</sub> O <sub>2</sub> S <sub>2</sub> | [{C <sub>18</sub> H <sub>36</sub> N <sub>2</sub> O <sub>6</sub> }Cs] <sub>2</sub> [W <sub>6</sub> I <sub>14</sub> ]<br>· 0.82 C <sub>4</sub> H <sub>8</sub> O · 0.58 H <sub>2</sub> O | [{C <sub>18</sub> H <sub>36</sub> N <sub>2</sub> O <sub>6</sub> }(H <sub>2</sub> O)(C <sub>4</sub> H <sub>7</sub> NO)Sr] <sub>2</sub> [W <sub>6</sub> I <sub>14</sub> ]<br>· 2 C <sub>4</sub> H <sub>7</sub> NO · 0.701 C <sub>4</sub> H <sub>7</sub> NO<br>· 0.299 H <sub>3</sub> CCN | [{C <sub>24</sub> H <sub>33</sub> N <sub>4</sub> O <sub>7</sub> }Na] <sub>2</sub> [W <sub>6</sub> I <sub>14</sub> ] |
| Formula weight                                  | 3826.97                                                                                                                                                   | 3881.68                                                                                                                                                                                  | 3956.52                                                                                                                                                                               | 3643.94                                                                                                                                                                                                                                                                                | 3810.78                                                                                                             |
| Temperature / K                                 | 100(2)                                                                                                                                                    | 100(2)                                                                                                                                                                                   | 293(2)                                                                                                                                                                                | 100(2)                                                                                                                                                                                                                                                                                 | 100(2)                                                                                                              |
| Wavelength / Å                                  | 0.71073                                                                                                                                                   | 0.71073                                                                                                                                                                                  | 0.71073                                                                                                                                                                               | 0.71073                                                                                                                                                                                                                                                                                | 0.71073                                                                                                             |
| Crystal system                                  | Triclinic                                                                                                                                                 | Triclinic                                                                                                                                                                                | Triclinic                                                                                                                                                                             | Orthorhombic                                                                                                                                                                                                                                                                           | Triclinic                                                                                                           |
| Space group                                     | <i>P</i> $\bar{1}$                                                                                                                                        | <i>P</i> $\bar{1}$                                                                                                                                                                       | <i>P</i> $\bar{1}$                                                                                                                                                                    | <i>P</i> 2 <sub>1</sub> 2 <sub>1</sub> 2 <sub>1</sub>                                                                                                                                                                                                                                  | <i>P</i> $\bar{1}$                                                                                                  |
| Unit cell dimensions                            |                                                                                                                                                           |                                                                                                                                                                                          |                                                                                                                                                                                       |                                                                                                                                                                                                                                                                                        |                                                                                                                     |
| <i>a</i> / Å                                    | 16.2061(6)                                                                                                                                                | 10.863(1)                                                                                                                                                                                | 14.8492(4)                                                                                                                                                                            | 17.4169(5)                                                                                                                                                                                                                                                                             | 11.5824(2)                                                                                                          |
| <i>b</i> / Å                                    | 16.5636(6)                                                                                                                                                | 13.777(2)                                                                                                                                                                                | 15.1634(5)                                                                                                                                                                            | 19.2144(6)                                                                                                                                                                                                                                                                             | 11.7282(2)                                                                                                          |
| <i>c</i> / Å                                    | 17.6306(6)                                                                                                                                                | 13.879(2)                                                                                                                                                                                | 22.2020(8)                                                                                                                                                                            | 20.5070(7)                                                                                                                                                                                                                                                                             | 14.5135(3)                                                                                                          |
| $\alpha$ / °                                    | 72.864(2)                                                                                                                                                 | 74.868(5)                                                                                                                                                                                | 72.954(3)                                                                                                                                                                             |                                                                                                                                                                                                                                                                                        | 106.396(1)                                                                                                          |
| $\beta$ / °                                     | 66.933(2)                                                                                                                                                 | 85.696(5)                                                                                                                                                                                | 87.373(3)                                                                                                                                                                             |                                                                                                                                                                                                                                                                                        | 91.055(1)                                                                                                           |
| $\gamma$ / °                                    | 68.017(1)                                                                                                                                                 | 79.503(5)                                                                                                                                                                                | 59.816(2)                                                                                                                                                                             |                                                                                                                                                                                                                                                                                        | 95.029(1)                                                                                                           |
| Volume / Å <sup>3</sup>                         | 3976.5(3)                                                                                                                                                 | 1970.7(4)                                                                                                                                                                                | 4100.2(2)                                                                                                                                                                             | 6862.8(4)                                                                                                                                                                                                                                                                              | 1882.15(6)                                                                                                          |
| Z                                               | 2                                                                                                                                                         | 1                                                                                                                                                                                        | 2                                                                                                                                                                                     | 4                                                                                                                                                                                                                                                                                      | 1                                                                                                                   |
| Density (calculated) / g·cm <sup>-3</sup>       | 3.196                                                                                                                                                     | 3.271                                                                                                                                                                                    | 3.205                                                                                                                                                                                 | 3.527                                                                                                                                                                                                                                                                                  | 3.362                                                                                                               |
| Absorption coefficient / mm <sup>-1</sup>       | 14.233                                                                                                                                                    | 15.504                                                                                                                                                                                   | 14.574                                                                                                                                                                                | 17.128                                                                                                                                                                                                                                                                                 | 14.933                                                                                                              |
| F(000)                                          | 3398                                                                                                                                                      | 1714                                                                                                                                                                                     | 3480                                                                                                                                                                                  | 6377                                                                                                                                                                                                                                                                                   | 1684                                                                                                                |
| Crystal size / mm <sup>3</sup>                  | 0.14 x 0.13 x 0.11                                                                                                                                        | 0.259 x 0.084 x 0.055                                                                                                                                                                    | 0.170 x 0.06 x 0.06                                                                                                                                                                   | 0.022 x 0.02 x 0.02                                                                                                                                                                                                                                                                    |                                                                                                                     |
| Theta range for data collection / °             | 1.650 to 25.026                                                                                                                                           | 1.880 to 27.769                                                                                                                                                                          | 2.690 to 25.500                                                                                                                                                                       | 1.865 to 27.103                                                                                                                                                                                                                                                                        | 1.767 to 27.501                                                                                                     |
| Index ranges                                    | -19 ≤ <i>h</i> ≤ 19, -19 ≤ <i>k</i> ≤ 19, -20 ≤ <i>l</i> ≤ 20                                                                                             | -14 ≤ <i>h</i> ≤ 14, -17 ≤ <i>k</i> ≤ 17, -18 ≤ <i>l</i> ≤ 18                                                                                                                            | -17 ≤ <i>h</i> ≤ 17, -18 ≤ <i>k</i> ≤ 18, -26 ≤ <i>l</i> ≤ 26                                                                                                                         | -21 ≤ <i>h</i> ≤ 22, -24 ≤ <i>k</i> ≤ 24, -26 ≤ <i>l</i> ≤ 26                                                                                                                                                                                                                          | -15 ≤ <i>h</i> ≤ 15, -15 ≤ <i>k</i> ≤ 15, -18 ≤ <i>l</i> ≤ 18                                                       |
| Reflections collected                           | 59772                                                                                                                                                     | 65904                                                                                                                                                                                    | 17545                                                                                                                                                                                 | 51859                                                                                                                                                                                                                                                                                  | 88555                                                                                                               |
| Independent reflections                         | 14000 [R(int) = 0.0285]                                                                                                                                   | 9207 [R(int) = 0.0171]                                                                                                                                                                   | 7542 [R(int) = 0.0753]                                                                                                                                                                | 15131 [R(int) = 0.0237]                                                                                                                                                                                                                                                                | 8601 [R(int) = 0.0224]                                                                                              |
| Completeness to theta = 25.242° / %             | 99.7                                                                                                                                                      | 99.9                                                                                                                                                                                     | 48.7                                                                                                                                                                                  | 99.9                                                                                                                                                                                                                                                                                   | 100.0                                                                                                               |
| Absorption correction                           | Semi-empirical from equivalents                                                                                                                           | Numerical                                                                                                                                                                                | Numerical                                                                                                                                                                             | Numerical                                                                                                                                                                                                                                                                              | Numerical                                                                                                           |
| Refinement method                               | Full-matrix least-squares on F <sup>2</sup>                                                                                                               | Full-matrix least-squares on F <sup>2</sup>                                                                                                                                              | Full-matrix least-squares on F <sup>2</sup>                                                                                                                                           | Full-matrix least-squares on F <sup>2</sup>                                                                                                                                                                                                                                            | Full-matrix least-squares on F <sup>2</sup>                                                                         |
| Data / restraints / parameters                  | 14000 / 0 / 743                                                                                                                                           | 9207 / 0 / 370                                                                                                                                                                           | 7542 / 246 / 649                                                                                                                                                                      | 15131 / 0 / 597                                                                                                                                                                                                                                                                        | 8601 / 6 / 490                                                                                                      |
| Goodness-of-fit on F <sup>2</sup>               | 1.010                                                                                                                                                     | 1.095                                                                                                                                                                                    | 1.047                                                                                                                                                                                 | 1.033                                                                                                                                                                                                                                                                                  | 1.045                                                                                                               |
| Final R indices [I > 2σ(I)]                     | R <sub>1</sub> = 0.0219, wR <sub>2</sub> = 0.0393                                                                                                         | R <sub>1</sub> = 0.0123, wR <sub>2</sub> = 0.0245                                                                                                                                        | R <sub>1</sub> = 0.0477, wR <sub>2</sub> = 0.1052                                                                                                                                     | R <sub>1</sub> = 0.0193, wR <sub>2</sub> = 0.0409                                                                                                                                                                                                                                      | R <sub>1</sub> = 0.0150, wR <sub>2</sub> = 0.0316                                                                   |
| R indices (all data)                            | R <sub>1</sub> = 0.0367, wR <sub>2</sub> = 0.0430                                                                                                         | R <sub>1</sub> = 0.0140, wR <sub>2</sub> = 0.0249                                                                                                                                        | R <sub>1</sub> = 0.0769, wR <sub>2</sub> = 0.1204                                                                                                                                     | R <sub>1</sub> = 0.0212, wR <sub>2</sub> = 0.0416                                                                                                                                                                                                                                      | R <sub>1</sub> = 0.0176, wR <sub>2</sub> = 0.0323                                                                   |
| Largest diff. peak and hole / e·Å <sup>-3</sup> | 1.050 and -0.896                                                                                                                                          | 0.777 and -0.651                                                                                                                                                                         | 1.072 and -1.056                                                                                                                                                                      | 1.900 and -1.268                                                                                                                                                                                                                                                                       | 0.743 and -1.413                                                                                                    |

**Table S2.** Single crystal structure refinement data for **(3)Nd·DMSO**, **(3)Yb·DMSO** and **(3)Lu·DMSO**

| Compound | (3)Nd·DMSO | (3)Yb·DMSO | (3)Lu·DMSO |
|----------|------------|------------|------------|
|----------|------------|------------|------------|

| Empirical formula                         | $[\{C_{36}H_{26}D_4N_8O_2\}Nd \cdot DMSO]_2[W_6I_{14}]_3$                                                                 | $[\{C_{36}H_{26}D_4N_8O_2\}Yb \cdot DMSO]_2[W_6I_{14}]_3$                                                                 | $[\{C_{36}H_{26}D_4N_8O_2\}Lu \cdot DMSO]_2[W_6I_{14}]_3$                                                              |
|-------------------------------------------|---------------------------------------------------------------------------------------------------------------------------|---------------------------------------------------------------------------------------------------------------------------|------------------------------------------------------------------------------------------------------------------------|
| CSD                                       | 1939598                                                                                                                   | 1938653                                                                                                                   | 1940624                                                                                                                |
| Exact formula                             | $[\{C_{36}H_{26}D_4N_8O_2\}Nd \cdot DMSO]_2[W_6I_{14}]_3 \cdot 7.42 C_2H_6SO \cdot 1.56 C_4H_{10}O \cdot 1.56 C_6H_{14}O$ | $[\{C_{36}H_{26}D_4N_8O_2\}Yb \cdot DMSO]_2[W_6I_{14}]_3 \cdot 7.42 C_2H_6SO \cdot 1.56 C_4H_{10}O \cdot 1.56 C_6H_{14}O$ | $[\{C_{36}H_{26}D_4N_8O_2\}Lu \cdot DMSO]_2[W_6I_{14}]_3 \cdot 7.42 C_2H_6SO \cdot 2 C_4H_{10}O \cdot 1.56 C_6H_{14}O$ |
| Formula weight                            | 11183.63                                                                                                                  | 11231.12                                                                                                                  | 11239.12                                                                                                               |
| Temperature / K                           | 100(2)                                                                                                                    | 100(2)                                                                                                                    | 100(2)                                                                                                                 |
| Wavelength / Å                            | 0.71073                                                                                                                   | 0.71073                                                                                                                   | 0.71073                                                                                                                |
| Crystal system                            | Monoclinic                                                                                                                | Monoclinic                                                                                                                | Monoclinic                                                                                                             |
| Space group                               | $P2_1/c$                                                                                                                  | $P2_1/c$                                                                                                                  | $P2_1/c$                                                                                                               |
| Unit cell dimensions                      |                                                                                                                           |                                                                                                                           |                                                                                                                        |
| $a / \text{Å}$                            | 14.560(3)                                                                                                                 | 14.5137(6)                                                                                                                | 14.576(6)                                                                                                              |
| $b / \text{Å}$                            | 24.342(7)                                                                                                                 | 24.5673(8)                                                                                                                | 24.51(1)                                                                                                               |
| $c / \text{Å}$                            | 30.796(6)                                                                                                                 | 30.292(1)                                                                                                                 | 30.76(1)                                                                                                               |
| $\beta / ^\circ$                          | 100.75(3)                                                                                                                 | 100.75                                                                                                                    | 101.658(5)                                                                                                             |
| Volume / Å <sup>3</sup>                   | 10726(4)                                                                                                                  | 10611.1(6)                                                                                                                | 10763(8)                                                                                                               |
| $Z$                                       | 2                                                                                                                         | 2                                                                                                                         | 2                                                                                                                      |
| Density (calculated) / g·cm <sup>-3</sup> | 3.462                                                                                                                     | 3.537                                                                                                                     | 3.468                                                                                                                  |
| Absorption coefficient / mm <sup>-1</sup> | 16.292                                                                                                                    | 16.857                                                                                                                    | 16.640                                                                                                                 |
| $F(000)$                                  | 9768.6                                                                                                                    | 9862.5                                                                                                                    | 9807                                                                                                                   |
| Crystal size / mm                         |                                                                                                                           |                                                                                                                           | 0.002                                                                                                                  |
| Theta range for data collection           |                                                                                                                           |                                                                                                                           | 27                                                                                                                     |
| Index ranges                              |                                                                                                                           |                                                                                                                           | $-29 \leq k \leq 29, -36 \leq l \leq 36$                                                                               |
| Reflections collected                     |                                                                                                                           |                                                                                                                           | 10000                                                                                                                  |
| Independent reflections                   |                                                                                                                           |                                                                                                                           | 2500                                                                                                                   |
| Completeness to $\theta = 25.00^\circ$    |                                                                                                                           |                                                                                                                           | 0.9999                                                                                                                 |
| Absorption correction                     |                                                                                                                           |                                                                                                                           | multi-scan                                                                                                             |
| Refinement method                         |                                                                                                                           |                                                                                                                           | full-matrix least-squares on $F^2$                                                                                     |
| Data / restraint                          |                                                                                                                           |                                                                                                                           | 995 / 0                                                                                                                |
| Goodness-of-fit on $F^2$                  |                                                                                                                           |                                                                                                                           | 1.000                                                                                                                  |
| Final R indices                           |                                                                                                                           |                                                                                                                           | $wR_2 = 0.1468$                                                                                                        |
| R indices (all data)                      |                                                                                                                           |                                                                                                                           | $wR_2 = 0.1722$                                                                                                        |
| Largest diff. peak / hole                 |                                                                                                                           |                                                                                                                           | 0.94 / -0.94                                                                                                           |

**Figure S1.** Layered structure arrangement in  $[\{C_{18}H_{36}N_2O_6\}A]_2[W_6I_{14}]$  (**1A**) on the example of  $A = K$ , (top) and  $A = Rb$  (bottom). Only the centers of gravity of  $\{C_{18}H_{36}N_2O_6\}A^+$  represented by the alkaline ion (grey spheres for K and red spheres for Rb) and the center of gravity of the  $[W_6I_{14}]^{2-}$  cluster ions (white spheres) are shown for clarity.

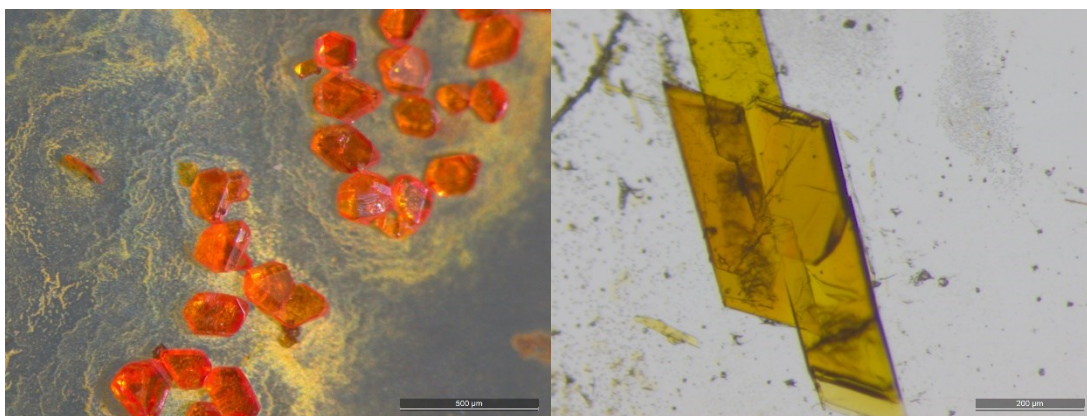

**Figure S2.** Light microscopy image of **(1)Cs** single crystals (left) and **(1)K** (right).

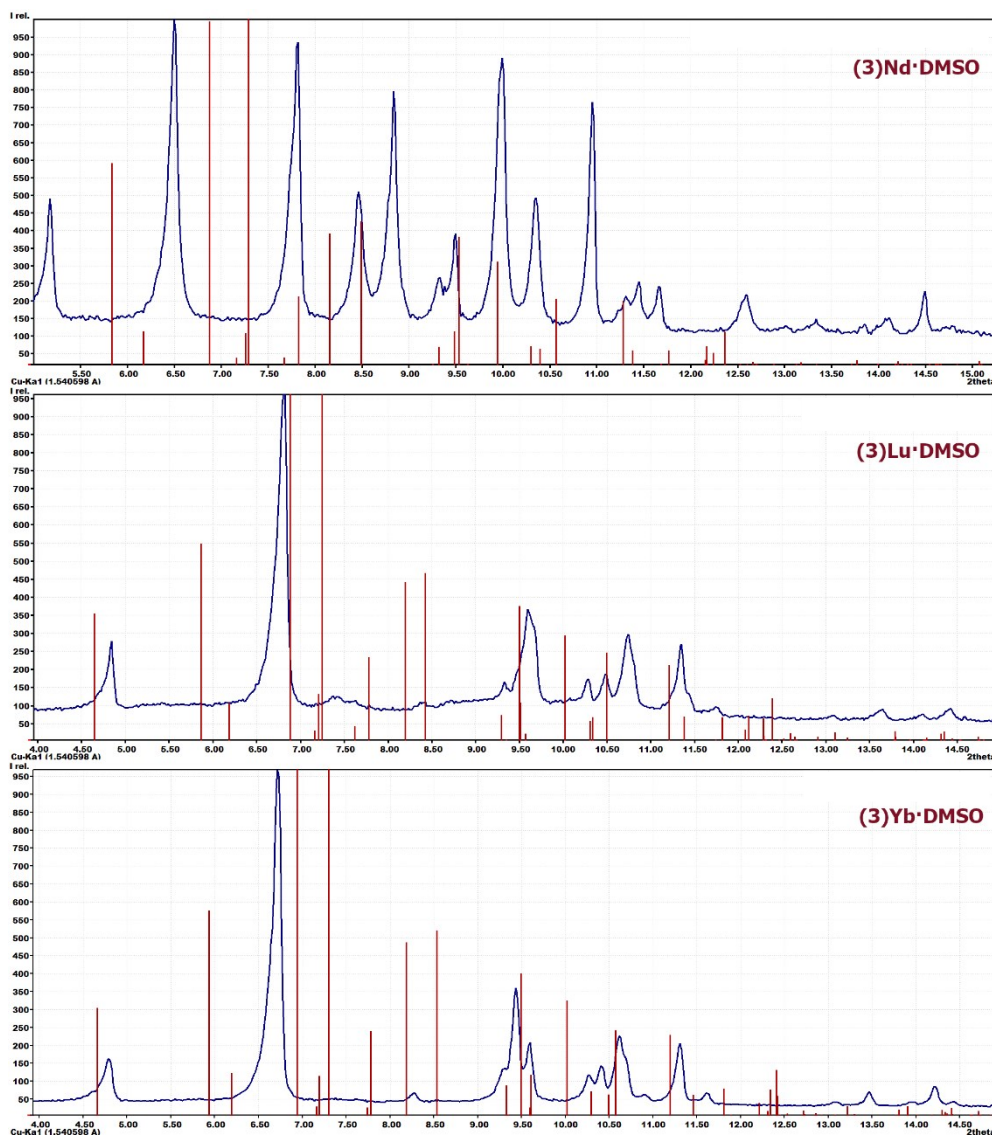

**Figure S3.** X-ray powder diffraction patterns of the product from the reaction of  $[\{C_{36}H_{26}D_4N_8O_2\}RE\cdot Cl]Cl_2$  with  $Cs_2[W_6I_{14}]$ . As the amount of solvents incorporated in the single crystals differ, the powder patterns are not expected to be in good agreement. Powder measurements of the supposed **(3)** $RE\cdot Cl$  do show the same pattern for  $RE = Yb$  and  $Lu$ . In red Bragg positions and intensities of the reference compounds  $[\{C_{36}H_{26}D_4N_8O_2\}RE\cdot DMSO]_2[W_6I_{14}]_3$  obtained from single crystal data are shown.

**Table S3.** Energy-dispersive X-ray spectroscopy measurement of products resulting from the reaction of  $\text{Cs}_2[\text{W}_6\text{I}_{14}]$  with  $[\{\text{C}_{36}\text{H}_{26}\text{D}_4\text{N}_8\text{O}_2\}\text{RE}\cdot\text{Cl}]\text{Cl}_2$  with  $RE = \text{Nd, Lu, Yb}$ . Results are normalized to six tungsten atoms of  $[\text{W}_6\text{I}_{14}]^{2-}$ .

| Element   | Measured composition for<br><b>(3)Lu·Cl</b> | Measured composition for<br><b>(3)Nd·Cl</b> | Measured composition for<br><b>(3)Yb·Cl</b> |
|-----------|---------------------------------------------|---------------------------------------------|---------------------------------------------|
| W         | 6                                           | 6                                           | 6                                           |
| I         | $12.27 \pm 2.67$                            | $13.78 \pm 1.50$                            | $7.90 \pm 1.76$                             |
| <i>RE</i> | $0.97 \pm 0.06$                             | $0.95 \pm 0.10$                             | $0.98 \pm 0.10$                             |
| Cl        | $0.92 \pm 0.17$                             | $1.09 \pm 0.29$                             | $1.07 \pm 0.19$                             |

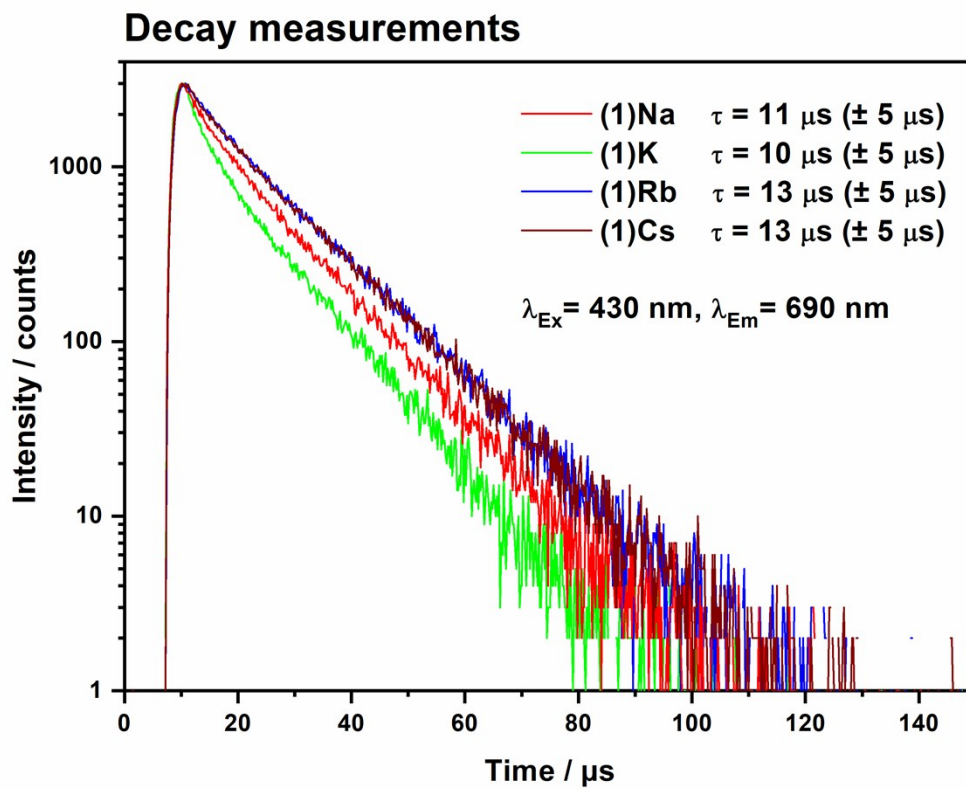

Figure S4. Decay measurements of **(1)***A* with *A* = Na, K, Rb, Cs.



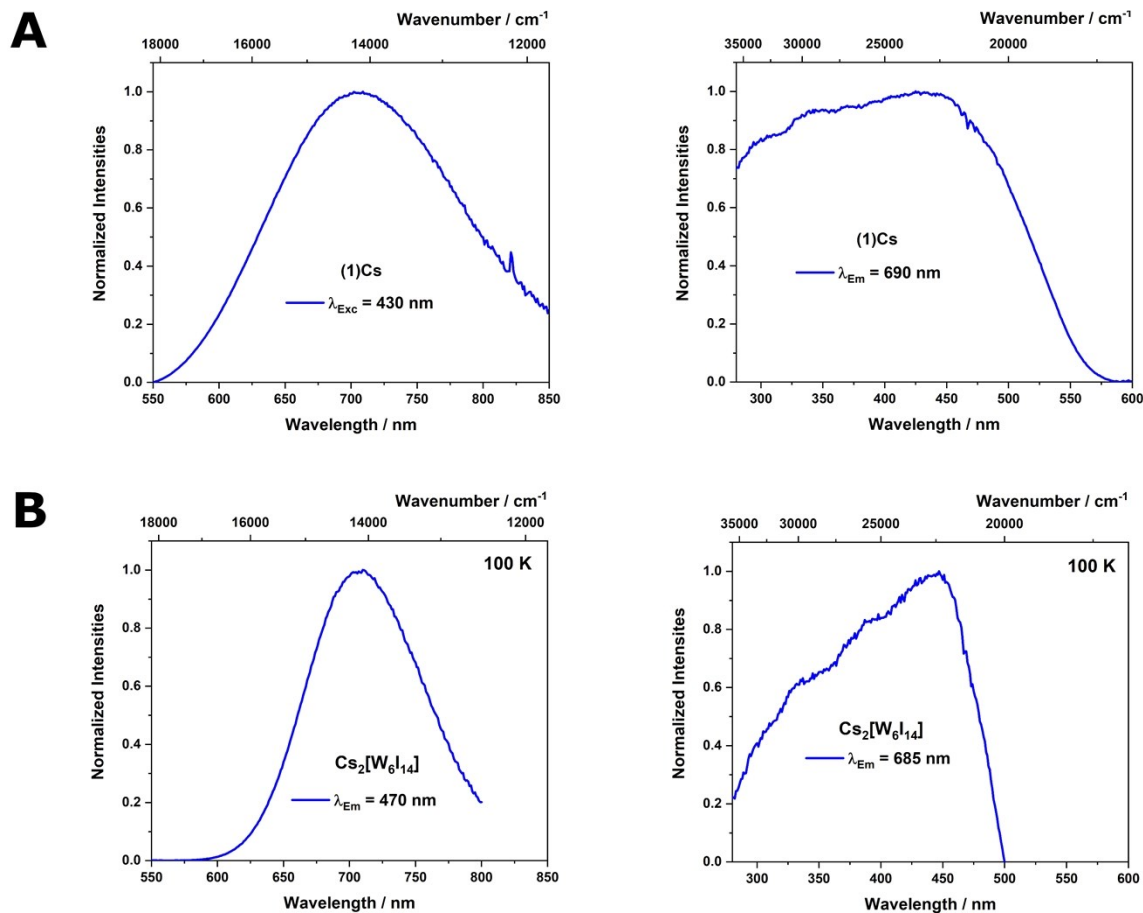

**Figure S5.** Maximum normalized emission spectra of solid (1)Cs (A, room temperature) and Cs<sub>2</sub>[W<sub>6</sub>I<sub>14</sub>] (B, 100 K) displaying the [W<sub>6</sub>I<sub>14</sub>]<sup>2-</sup> emission upon excitation the cluster anion at 430 nm and 470 nm respectively. Excitation spectra are recorded by monitoring the 690 nm and 685 nm emission of [W<sub>6</sub>I<sub>14</sub>]<sup>2-</sup>.

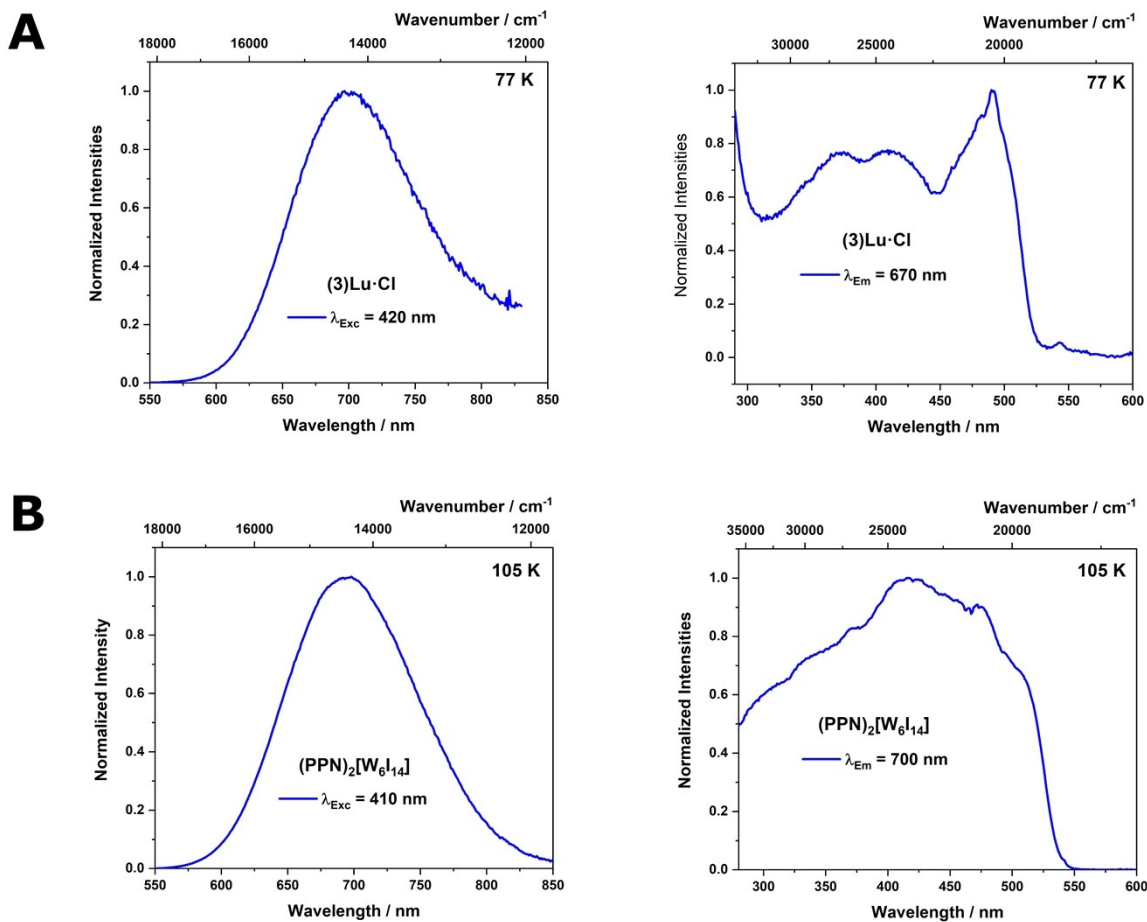

**Figure S6.** Maximum normalized emission spectra of solid **(3)Lu·Cl** (A, 77 K) and **(PPN)<sub>2</sub>[W<sub>6</sub>I<sub>14</sub>]** (B, 105 K) displaying the **[W<sub>6</sub>I<sub>14</sub>]<sup>2-</sup>** emission upon excitation the cluster anion at 420 nm and 410 nm respectively. Excitation spectra are recorded by monitoring the 670 nm and 700 nm emission of **[W<sub>6</sub>I<sub>14</sub>]<sup>2-</sup>**.
